# Supplementary material
Source: Springer Nature journal article supplement (https://www.springermedizin.de/resource/supplementary/12891_2010_976_MOESM2_ESM.pdf/9506840)

**A**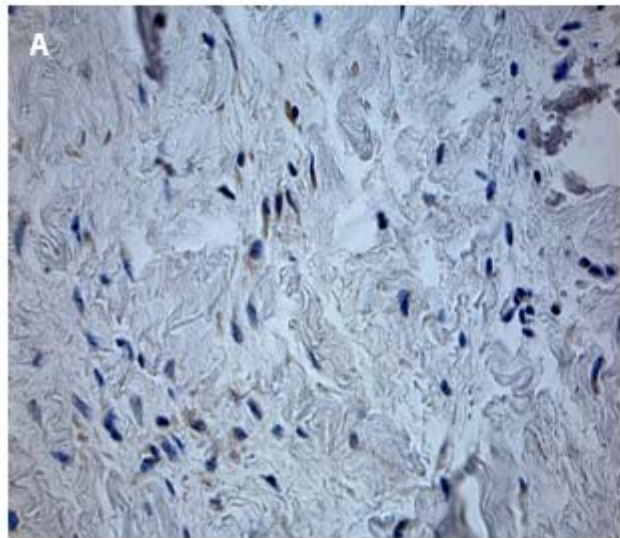**B**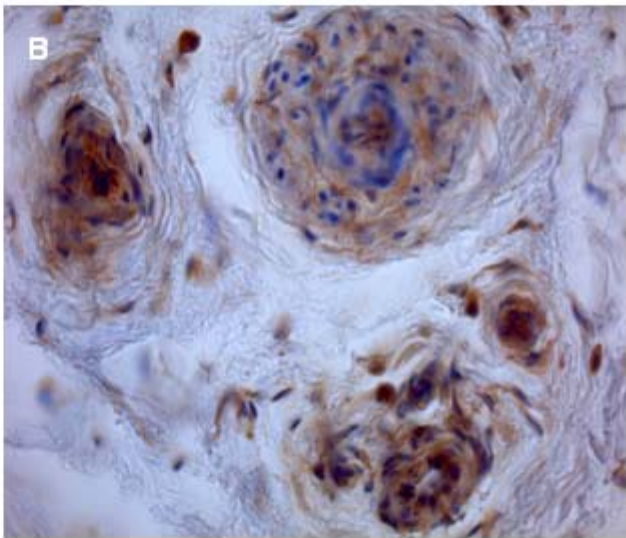

Supplement: MOESM2 [file 9506840]
